1 **Increased usage of antiseptics is associated with reduced susceptibility in clinical**  
2 **isolates of *S. aureus***

3

4 **Katherine Hardy** <sup>1,2</sup>, **Katie Sunnucks** <sup>2</sup>, **Hannah Gil** <sup>2</sup>, **Sahida Shabir** <sup>3</sup>, **Eleftheria**  
5 **Trampari** <sup>4</sup>, **Peter Hawkey** <sup>2,5</sup> and **Mark Webber**<sup>4</sup>

6

7 1. Public Health England Birmingham Laboratory, Heart of England NHS Foundation Trust,  
8 Birmingham, UK, B9 5SS

9 2. Institute of Microbiology and Infection, University of Birmingham, Birmingham, UK, B15  
10 2TT

11 3. Research and Development, Heart of England NHS Foundation Trust, Bordesley Green  
12 East, Birmingham, UK, B9 5SS

13 4. Quadram Institute Bioscience, Norwich Research Park, Norwich, UK, NR4 7UA

14 5. University Hospital Birmingham, Birmingham, UK, B15 2TH

15

16

17 **Key words:**

18 Methicillin resistant *Staphylococcus aureus*, Chlorhexidine, Octenidine dihydrochloride

19

20

21

## 22 **Abstract**

23 Hospital acquired infection is a major cause of morbidity and mortality and regimes to  
24 prevent infection are crucial in infection control. These include decolonisation of at-risk  
25 patients of carriage of MRSA which is commonly achieved by protocols that include the use  
26 of chlorhexidine, or octenidine as biocidal agents. There is however no standardised single  
27 decolonisation regime agreed upon in the UK or other countries and protocols include a  
28 variety of active agents. Antibiotic resistant bacteria cause major problems in hospital  
29 medicine and concern has been raised regarding the development of biocide resistance  
30 which would cause decolonisation regimes to become unreliable. In this study, we  
31 assembled a panel of isolates of *S. aureus* including isolates collected before the  
32 development of chlorhexidine and octenidine through to a contemporaneous panel of  
33 isolates from a major hospital trust in the UK during a period when the decolonisation regime  
34 was altered. We observed significant increases in the MIC and MBC of chlorhexidine in  
35 isolates collected from periods of high usage of chlorhexidine. No isolates had a significantly  
36 altered MIC or MBC of octenidine apart from those collected after octenidine was introduced  
37 into the trust where isolates with four-fold decreases in susceptibility emerged. There was no  
38 suggestion of cross-resistance between the two biocidal agents. A combination of VNTR,  
39 PCR for *qac* genes and whole genome sequencing was used to type isolates and examine  
40 possible mechanisms of resistance. The typing data showed no expansion of a single strain  
41 was associated with decreased biocide tolerance and isolates with increased chlorhexidine  
42 MIC and MBCs were found from different clonal complexes; CC8, CC22 and CC30. Biocide  
43 susceptibility did not correlate with carriage of *qac* efflux pump genes – carriage of *qacA* and  
44 *qacB* was detected but, with one exception was restricted to isolates of CC8. Analysis of  
45 genome sequence data for closely related pairs of strains with differential biocide  
46 susceptibility revealed no common mutations or carriage of accessory elements that  
47 correlated with biocide tolerance. Mutations with the NorA or NorB efflux pumps, previously  
48 associated with chlorhexidine export were identified suggesting this may be an important  
49 mechanism of biocide tolerance. The clinical relevance of decreased biocide tolerance in  
50 terms of efficacy of decolonisation therapies remains to be established but we present  
51 evidence here that isolates are evolving in the face of biocide challenge in patients and that  
52 changes to decolonisation regimes are reflected in changes in susceptibility of isolates. More  
53 work is needed to assess the impact of these changes to ensure effective and robust  
54 decolonisation protocols remain in place.

55

56

## 57 **Introduction**

58 Antiseptics, and especially chlorhexidine, have been used widely as one of the key  
59 measures implemented in the control of infections caused by methicillin resistant  
60 *Staphylococcus aureus* (MRSA) in hospitals. The most widely used approach has been to  
61 use antiseptics as part of a decolonisation protocol for patients who are known to be  
62 colonised with MRSA in conjunction with nasal mupirocin. However, in some units,  
63 especially intensive care units, antiseptics have been used universally for washing of all  
64 patients (Climo *et al.*, 2013).

65 Chlorhexidine, which was first synthesised in 1954 (Davies *et al.*, 1954), is the most widely  
66 used antiseptic. It is a cationic biguanide agent that acts by disrupting the bacterial cell  
67 membrane. A more recent introduction to clinical practice is Octenidine dihydrochloride,  
68 which was synthesised over 30 years later (Sedlock and Bailey, 1985). Like chlorhexidine it  
69 is a cationic biguanide agent that has a broad spectrum of activity.

70 Due to the widespread usage of chlorhexidine, questions have been raised over the  
71 development of resistance (Wesgate *et al.*, 2016., Oggioni *et al.*, 2013). Determination of  
72 chlorhexidine susceptibility has most often relied on data from minimum inhibitory  
73 concentration (MIC) determinations. The MIC is however an imperfect method for testing  
74 biocide resistance where the lethal rather than inhibitory concentration of the agent is of  
75 primary importance and needs to be measured. In addition, there is no agreed standardised  
76 testing methodology and no national or international agreement regarding an appropriate cut  
77 off for defining chlorhexidine resistance. However, many studies have often defined isolates  
78 with a chlorhexidine MIC  $\geq 4$ mg/l as resistant (Horner *et al.*, 2012). No definition has been  
79 proposed for Octenidine.

80 The mechanisms of action and resistance to biocides including chlorhexidine remain poorly  
81 understood, although there are several genes that encode efflux pumps which have been  
82 shown to be able to influence biocide susceptibility. Of these, *qacA* is the most commonly  
83 associated with reduced susceptibility to chlorhexidine in Staphylococci. However, the  
84 presence of *qacA* does not necessarily result in expression of resistance to chlorhexidine  
85 and conversely resistance can be expressed without the presence of *qacA* (McGann *et al.*,  
86 2011; Longtin *et al.*, 2011).

87 Most studies that have investigated reduced susceptibility to biocides have studied  
88 chlorhexidine. The limited number of studies that have investigated octenidine have looked  
89 at the clinical efficacy and have not included susceptibility testing as part of their studies,

90 with the only *in vitro* study failing to select for resistance to octenidine dihydrochloride (Al  
91 Doori *et al.*, 2007; Spencer *et al.*, 2013; Krishna *et al.*, 2010). Unlike octenidine, reduced  
92 susceptibility has been described in chlorhexidine, with the prevalence rates varying  
93 between studies (Horner *et al.*, 2012). Few longitudinal studies have been reported, but one  
94 in Taiwan observed an increase in the percentage of MRSA strains with reduced  
95 susceptibility to chlorhexidine from 1.7% to 46.7% from 1990 to 2005 (Wang *et al.*, 2008).  
96 Whilst significant increases in the MIC between both MSSA and MRSA isolates from 1989  
97 compared to 2000 were observed by Lambert (Lambert, 2004). Warren *et al.*, observed a  
98 non-linear increase in the presence of *qacA/B* positive isolates, markedly increasing in years  
99 five and six of their study, but then decreasing in the following two years (Warren *et al.*,  
100 2016). There have also been case reports of the selection of isolates with an increase in  
101 chlorhexidine MIC in patients receiving chlorhexidine as part of a decolonisation regime  
102 (Johnson *et al.*, 2015).

103 Despite the reporting of isolates with reduced antiseptic susceptibility, the clinical impact of  
104 this is unclear with antiseptics being used at much higher concentrations than the typical  
105 MIC or MBC of these isolates. However, there are reports of clinical failures of  
106 decolonisation, including both an outbreak of a specific clone of MRSA that had decreased  
107 susceptibility to chlorhexidine and the persistence of a hospital clone that carried *qacA* and  
108 out-competed a non *qacA* carrying clone (Kampf *et al.*, 2016; Otter *et al.*, 2013; Batra *et al.*,  
109 2010).

110 This study aimed to investigate whether susceptibility to the two most commonly used  
111 biocides for the decolonisation of patients colonised with MRSA, chlorhexidine and  
112 octenidine dihydrochloride, varied in a unique panel of *S. aureus* strains isolated over an  
113 extended period where chlorhexidine use increased and octenidine was introduced.

114

115

## 116 **Materials and Methods**

117 A panel of 157 *S. aureus* and methicillin resistant *S. aureus* strains isolated between 1928  
118 and 2014 were included in the study (Table 1). This panel includes some of the earliest  
119 MRSA isolates from the 1960s and 1970s, from the National Culture Type Collection  
120 (NCTC). All MRSA isolates from 2002 onwards were collected from one large NHS trust in  
121 the West Midlands of the UK. Since 2002 the hospital has had a policy of prescribing a 5 day  
122 course of chlorhexidine to decolonise all known MRSA positive patients. In 2014 universal  
123 washing of all patients with octenidine dihydrochloride for the duration of their hospital stay  
124 was implemented, with those patients identified as being colonised/infected with MRSA  
125 continuing to receive chlorhexidine.

126 In this study both screening and clinical isolates were included. The isolates were grouped  
127 into four panels (Table 1) to reflect the usage of octenidine dihydrochloride and chlorhexidine  
128 from 1928 to 2014 (Groups 1-4). The first group comprised 15 MSSA isolates from 1928-  
129 1953 where there was no use of either antiseptic and provides historical context for  
130 susceptibility of populations unexposed to antiseptics. The second group contained 54  
131 MRSA and 9 MSSA isolates from 1954-2001 where there was low usage of chlorhexidine  
132 and no usage of octenidine. The third group contained 1 MSSA and 52 MRSA isolates from  
133 2002-2012 where chlorhexidine usage was high but octenidine was not used and the final  
134 group contained 26 MRSA isolates from 2013-2014 where there was high use of  
135 chlorhexidine and octenidine had been introduced. The dominance of MRSA over MSSA  
136 isolates reflects routine surveillance practice where MRSA are actively identified in patients  
137 on admission but MSSA are not.

138 The minimum inhibitory concentrations (MIC) of each agent were determined using broth  
139 microdilution (following recommendations from EUCAST) ranging in concentration from  
140 0.0029µg/ml to 3µg/ml for octenidine dihydrochloride and 0.0625µg/ml to 64µg/ml for  
141 chlorhexidine digluconate. Minimum bactericidal concentrations (MBC) were subsequently  
142 determined by inoculation of 10 µl of suspensions following determinations of MICs onto LB  
143 agar and observing growth after overnight incubation. The presence of *qacA/B* was  
144 determined in all samples using multiplex PCR (Vali *et al.*, 2008).

145 A panel of 99/157 isolates which included all *qacA/B* positive isolates and all isolates from  
146 groups 3 and 4 were epidemiologically typed using variable number tandem repeats as  
147 previously described (Hardy *et al.*, 2006). A selection of 16 isolates from groups 3 and 4 to  
148 include the main circulating clones were also genome sequenced using Illumina paired end  
149 sequencing. Reads were then analysed using the 'nullarbor' pipeline (v1.2; Seemann *et al.*,

150 2017) using a standard virtual machine on the MRC CLIMB framework. Pan genomes were  
151 generated using 'roary' (v8.0), SNPs called with 'snippy' (v3.0) and antibiotic resistance  
152 genes and mutations identified using 'ARIBA' (v2.8.1). Trees were visualised with  
153 'Phandango'. All packages used default parameters unless stated otherwise.

154 Data was obtained for the number of packs of chlorhexidine and octenidine dihydrochloride  
155 issued by pharmacy in the large teaching Trust from 2008 to 2014 where the MRSA isolates  
156 were obtained from. Statistical analysis of changes in susceptibility patterns between groups  
157 used chi-squared and Mann-Whitney tests.

158

159

## 160 **Results**

### 161 **Usage of chlorhexidine and octenidine**

162 The use of chlorhexidine and octenidine was analysed in our hospital showing a decrease in  
163 usage of chlorhexidine and an increase in octenidine use across the study period. The  
164 usage of chlorhexidine decreased from 7,061 packs being dispensed in 2009 to 5091 in  
165 2014. In contrast, the usage of octenidine dihydrochloride has increased markedly, with  
166 none being prescribed in or before 2013, increasing to 18,844 bottles in 2014.

### 167 **Biocide susceptibility of isolates**

168 The MIC and MBC of chlorhexidine was significantly different between the four groups.  
169 Chlorhexidine MICs ranged from 0.5 µg/ml to 32 µg/ml, with a significant increase in the  
170 mean MICs over time from group 1 to 3, with then a slight reduction in group 4 compared to  
171 group 3 (Figure 1). This increase in mean MIC was a result of a shift of susceptibility of most  
172 isolates in the population requiring higher MICs rather than being a result of a small sub-  
173 population of highly resistant isolates. The MBCs of chlorhexidine showed a similar pattern,  
174 the percentage of isolates with an MBC >32 µg/ml increased from group 1 to 3, with 0, 5.5  
175 and 36.5% of isolates having an MBC >32 µg/ml in groups 1, 2 and 3 respectively (Figure 3).  
176 The differences in MIC and MBC distributions between the groups were not likely to be  
177 random according to statistical tests (chi-squared and Mann-Whitney tests both returned p  
178 values <0.05 comparing groups 3 and 4 and 1 and 2).

179 The MIC and MBC of octenidine dihydrochloride were both lower than chlorhexidine and  
180 ranged from 0.09375 µg/ml to 1.5 µg/ml. The MBC of octenidine was stable against isolates  
181 in groups 1-3 with all isolates being inhibited by 0.0375-0.75 µg/ml. Isolates with a markedly  
182 decreased susceptibility were however isolated in group 4 after introduction of this agent  
183 (Figures 1 and 2). The difference between MIC and MBC values for the final group (4) and  
184 other groups was statistically significant ( $P < 0.05$ ).

185 Interestingly, there was no correlation between susceptibility to the two agents, i.e. a raised  
186 chlorhexidine MIC was not likely to be reflected by a raised octenidine dihydrochloride MIC in  
187 the same isolate (tested using Pearson's correlation test).

188 The changes in susceptibility to both agents reflected usage data although it was not  
189 possible to statistically analyse these changes.

### 190 **Typing of isolates**

191 VNTR analysis of the isolates revealed CC22 to be the most predominant clonal complex,  
192 which is the endemic strain within the UK. The other two clonal complexes represented were  
193 CC36 and CC8 (Figure 3).

194 The phylogenetic analysis failed to identify a specific clone or lineage which showed reduced  
195 susceptibility to chlorhexidine (Figure 3). Interestingly, overlaying susceptibility data onto the  
196 phylogeny demonstrated several occasions where isolates with the same VNTR profile  
197 differed in MIC for both chlorhexidine and octenidine dihydrochloride suggesting the  
198 acquisition of decreased susceptibility is not restricted to one clonal complex and that it may  
199 be able to evolve independently from various strains (Figure 3).

### 200 **Carriage of *qac* genes**

201 A total of 18/157 (11.4%) of all isolates were positive for carriage of the *qacA/B* gene, all of  
202 these were MRSA isolates apart from one MSSA isolate. All of the isolates carrying the  
203 *qacA/B* gene had a chlorhexidine MBC >4µg/ml. The majority of isolates in the collection with  
204 the highest MICs and MBCs did not however carry *qacA/B*. The highest percentage of  
205 isolates carrying the *qacA/B* gene were in group 2 (20.6%) as opposed to groups 3 and 4  
206 where only 5.6% and 7.7% of isolates were carrying *qacA/B*, *qacA/B* was not detected in any  
207 of the pre 1954 isolates in group 1. VNTR typing of all the *qacA/B* positive isolates revealed  
208 all but one of the *qacA/B* positive isolates clustered and belonged to CC8 (Figure 3). The  
209 other isolate was from the ST22 cluster and no isolates from the ST36 cluster carried a *qac*  
210 gene.

### 211 **Genomic analysis of ST22 isolates**

212 Sixteen strains with related VNTR profiles from groups 3 and four and a range of  
213 chlorhexidine MBCs were whole genome sequenced and mechanisms which may contribute  
214 to decreased susceptibility to chlorhexidine were identified. Figure 4 shows the phylogeny of  
215 these strains based on a whole genome alignment (produced by ROARY). Comparisons of  
216 the accessory genome content, resistance genes (by ARIBA) and presence and absence of  
217 core genes attempted to identify common changes in those isolates with highest MBCs.  
218 There were no common accessory genes identified or carriage of a known resistance  
219 mechanism that correlates with biocide resistance. To further try and identify a tolerance  
220 mechanism two pairs of strains with four fold differences in susceptibility (by MBC) but which  
221 were very closely related according to the phylogeny were compared for changes (strains 3  
222 vs 7 and strain 2 vs the reference ST22; HO\_5096\_041, Figure 5). Analysis of these strain  
223 pairs found a small number of SNPs between each (5 vs 20 SNPs between each pair,



224 respectively), the two more resistant isolates both had changes in either of two homologous  
225 efflux pump systems; NorA and NorB. Both have been shown to export multiple agents  
226 including biocides (DeMarco et al., 2007). Strain 2 carried a SNP within *norB* that results in a  
227 change of the NorB protein of Met314Ile. This substitution is adjacent to the predicted  
228 translocation pore and may alter the capacity of this strain to export chlorhexidine compared  
229 to the reference. Strain 7 had a wild-type *norB* allele but carried a SNP within *norA* resulting  
230 in a change in NorA of Ala362Val. Substitution at this site has previously been shown to  
231 improve efflux capacity of the protein for some substrates (Kaatz *et al.*, 1993). None of the  
232 other sequenced strains had changes within either system or in their known regulators.

233

## 234 Discussion

235 This study has highlighted that the increasing use of chlorhexidine and octenidine  
236 dihydrochloride is associated with emergence of reduced susceptibility to each agent in *S.*  
237 *aureus*. As described in previous studies (Wang *et al.*, 2008; Liu *et al.*, 2015) the number of  
238 *S. aureus* and especially MRSA isolates demonstrating reduced susceptibility to  
239 chlorhexidine increased over time, which in the current study was most marked when the  
240 MRSA epidemic was at its peak within the UK.

241 There have only been a limited number of studies that have investigated reduced  
242 susceptibility to chlorhexidine longitudinally and all have been over shorter time periods.  
243 Historical isolates included in this study from a period of no antiseptic usage had very low  
244 MIC and MBC and increases were then observed in groups two and three. Interestingly  
245 unlike other longitudinal studies where there have been similar observations we did observe  
246 a reduction in the MICs in the fourth time period. This can be correlated with a reduction in  
247 the number of MRSA infections within the UK and reduction in chlorhexidine usage in our  
248 hospital.

249 We also demonstrate a reduction in susceptibility to octenidine following universal  
250 introduction. There have been a limited number of studies investigating the clinical efficacy  
251 of octenidine dihydrochloride which whilst being small demonstrated comparable efficacy to  
252 chlorhexidine, but did not include susceptibility testing as part of the studies (Spencer *et al.*,  
253 2013; Krishna *et al.*, 2010). The only *in vitro* study failed to select for resistance to octenidine  
254 dihydrochloride (Al Doori *et al.*, 2007).

255 Whilst there has been a demonstrable reduction in susceptibility in isolates in the current  
256 study and this markedly occurred after the introduction of octenidine into practice the MIC  
257 and MBC are still relatively low and significantly below the concentrations that the antiseptics  
258 are used at in practice. It is unclear what impact these relatively small changes in tolerance  
259 as measured *in vitro* have in practice. Comparing the MIC values to in use concentrations  
260 suggests that it is unlikely that these isolates will affect clinical efficacy, but they have  
261 emerged in a real world situation suggesting there is a significant benefit which has been  
262 selected in practice. Interestingly, octenidine dihydrochloride was only in use for one year  
263 before there was a marked change in the susceptibility of isolates.

264 For both biocides, isolates with decreased susceptibility were not clonal which suggests  
265 there has been no emergence of a dominant clone which may have an advantage in the  
266 face of either biocide. The fact that isolates with decreased susceptibility are seen in various

267 strain backgrounds suggests that the capacity to develop this phenotype is common to many  
268 strains and, presumably results from a change in the *S. aureus* core genome. This differs to  
269 previous reports where there has been spread of a dominant clone with reduced  
270 susceptibility (Otter *et al.*, 2013).

271 As highlighted by the review by Harbarth and colleagues the increased usage of antiseptics  
272 has not been matched by an increase in surveillance, both microbiological and clinical  
273 (Harbarth *et al.*, 2014). One of the reasons for the lack of surveillance is the lack of both  
274 standardised testing methodology and definitions for resistance. The majority of studies have  
275 utilised MICs, but the methodologies vary and the technique is less applicable for antiseptics  
276 where the lethal rather than the inhibitory concentration needs to be measured and MBC  
277 testing is more meaningful. As there is no standardised testing methodology there has been  
278 no national or international agreement regarding an appropriate cut off for defining  
279 resistance. The clinical impact of reduced susceptibility demonstrated *in vitro* also needs to  
280 be assessed, with the concentrations of antiseptics measured *in vitro* are much lower than  
281 concentrations of antiseptics achieved *in vivo*.

282 Epidemiological typing in this study revealed that isolates with high MICs are spread across  
283 VNTR profiles, both in the predominant epidemic clone observed in the UK, ST22 and in  
284 CC8. When this is compared with the presence of *qacA/B* there was no correlation with  
285 chlorhexidine susceptibility; the majority of *qacA/B* isolates were from CC8. This clonal  
286 complex contains ST239 which has previously been described as carrying the *qacA/B* genes  
287 and has been associated with clinical failure of chlorhexidine (Batra *et al.*, 2010). Carriage of  
288 *qacA/B* was only seen in one ST22 isolate in our panel, which is the most predominant ST  
289 both within the study hospital and in the UK. Despite the lack of carriage of *qacA/B* in ST22,  
290 the number of isolates with raised MICs was the same as amongst those from the CC8  
291 group, highlighting further the lack of correlation between the presence of *qacA/B* and  
292 reduced susceptibility to chlorhexidine.

293 Consistent with the lack of correlation of *qacAB* carriage and antiseptic susceptibility, a  
294 genomic analysis of a subset of strains revealed no common mobile element which  
295 associated with chlorhexidine susceptibility. In two pairs of isolates with different  
296 chlorhexidine MICs mutations within chromosomal multidrug efflux systems *norA* or *norB*  
297 were found. NorA and NorB have previously been associated with chlorhexidine tolerance  
298 with isolates that over-express these systems demonstrating decreased chlorhexidine  
299 susceptibility (Liu *et al.*, 2015; Vali *et al.*, 2008, DeMarco *et al.*, 2007) although another study  
300 reported only a weak association (Furi *et al.*, 2013). Both *norA* and *norB* are part of the core

301 *S. aureus* genome which is consistent with our observation that decreased susceptibility to  
302 chlorhexidine can emerge from multiple lineages and is not conditional on horizontal  
303 acquisition of *qacA/B*. Previous studies have focused on expression changes of efflux  
304 systems as a mechanism to increase efficiency of export of substrates. Mutation within the  
305 structural pump protein of a multidrug efflux system was also recently shown to increase  
306 efficiency of export of some substrates at the expense of others (Blair *et al.*, 2015). The  
307 substitutions within NorB (adjacent to the translocation pore) and NorA (known to alter pump  
308 efficiency for fluoroquinolone export) identified here may reflect adaptation to increase  
309 efficiency of chlorhexidine export.

310 There is an obvious need for more research in this area to provide better surveillance data  
311 from larger populations and geographical regimes, and to understand the mechanisms of  
312 action and resistance to antiseptics better. The significance and clinical impact of the  
313 emergence of isolates with decreased susceptibility to decolonisation regimes remains  
314 uncertain. However, the introduction of chlorhexidine and octenidine dihydrochloride has  
315 changed the susceptibility of the *S. aureus* population compared to pre-biocide times and  
316 they are therefore having an ecological impact. The consequences of this remain unclear.

317

318

319

320

321

322

## 323 References

- 324 1. Al-Doori Z, Goroncy-Bermes P, Gemmel IC, Morrison D. (2007) Low-level exposure  
325 of MRSA to octenidine dihydrochloride does not select for resistance. *J Antimicrob*  
326 *Chemother.* 59:1280-1282
- 327 2. Batra R, Cooper BS, Whiteley, C. (2010) Efficacy and limitation of a chlorhexidine  
328 based decolonisation strategy in preventing transmission of methicillin-resistant  
329 *Staphylococcus aureus* in an intensive care unit. *Clin Infect Dis.* 50: 210-7
- 330 3. Blair JM, Bavro VN, Ricci V, Modi N, Cacciotto P, Kleinekathöfer U, Ruggerone P,  
331 Vargiu AV, Baylay AJ, Smith HE, Brandon Y, Galloway D, Piddock LJ. (2015) AcrB  
332 drug-binding pocket substitution confers clinically relevant resistance and altered  
333 substrate specificity. *Proc Natl Acad Sci U S A.* 112(11):3511-6.
- 334 4. Climo MW, Yokoe DS, Warren DK. (2013) Effect of daily chlorhexidine bathing on  
335 hospital acquired infection. *N Engl J Med;* 368:8; pp. 533-542.
- 336 5. Davies GE, Francis J, Martin AR, Rose FL, Swain G. (1954) 1:6-Di-4'-  
337 chlorophenyldiguanidohexane (hibitane); laboratory investigation of a new  
338 antibacterial agent of high potency. *Br J Pharmacol Chemother.* 9(2):192-6.
- 339 6. DeMarco CE, Cushing LA, Frempong-Manso E, Seo SM, Jaravaza TA, Kaatz GW.  
340 (2007) Efflux-related resistance to norfloxacin, dyes, and biocides in bloodstream  
341 isolates of *Staphylococcus aureus*. *Antimicrob Agents Chemother.* 51(9):3235-9.
- 342 7. Furi L, Ciusa ML, Knight D, Di Lorenzo V, Tocci N, Cirasola D, Aragones L, Coelho  
343 JR, Freitas AT, Marchi E, Moce L, Visa P, Northwood JB, Viti C, Borghi E, Orefici G;  
344 BIOHYPO Consortium, Morrissey I, Oggioni MR. (2013) Evaluation of reduced  
345 susceptibility to quaternary ammonium compounds and bisbiguanides in clinical  
346 isolates and laboratory-generated mutants of *Staphylococcus aureus*. *Antimicrob*  
347 *Agents Chemother.* 57(8):3488-97.
- 348 8. Harbarth, S., Tuan, Soh S., Horner, C. and Wilcox, M.H. (2014) Is reduced  
349 susceptibility to disinfectants and antiseptics a risk in healthcare settings? A  
350 point/counterpoint review. *J Hosp Infect;* 87(4), pp. 194-202.
- 351 9. Hardy KJ, Oppenheim BA, Gossain S, Gao F, Hawkey PM. (2006) Use of variations  
352 in staphylococcal interspersed repeat units for molecular typing of methicillin-  
353 resistant *Staphylococcus aureus* strains. *J Clin Microbiol.* Jan;44(1):271-3.
- 354 10. Horner C, Mawer D, Wilcox M. (2012) Reduced susceptibility to chlorhexidine in  
355 staphylococci: is it increasing and does it matter? *J Antimicrob Chemother;* 67: pp.  
356 2547-2559
- 357 11. Johnson RC, Schlett CD, Crawford K, Lanier JB, Merrell DS, Ellis MW. (2015)  
358 Recurrent Methicillin-Resistant *Staphylococcus aureus* Cutaneous Abscesses and

- 359 Selection of Reduced Chlorhexidine Susceptibility during Chlorhexidine Use. *J Clin*  
360 *Microbiol.* 53(11):3677-82.
- 361 12. Kaatz GW, Seo SM, Ruble CA. (1993) Efflux-mediated fluoroquinolone resistance is  
362 *Staphylococcus aureus*. *Antimicrob Agents Chemother.* 37(5):1086-1094.
- 363 13. Kampf G. (2016) Acquired resistance to chlorhexidine - is it time to establish an  
364 'antiseptic stewardship' initiative? *J Hosp Infect.* 94(3):213-227.
- 365 14. Krishna BV and Gibb AP. (2010) Use of octenidine dihydrochloride in methicillin  
366 resistant *Staphylococcus aureus* decolonisation regimens: a literature review. *J Hosp*  
367 *Infect.* 74: pp. 199-203
- 368 15. Lambert RJ. (2004) Comparative analysis of antibiotic and antimicrobial biocide  
369 susceptibility data in clinical isolates of methicillin-sensitive *Staphylococcus aureus*,  
370 methicillin-resistant *Staphylococcus aureus* and *Pseudomonas aeruginosa* between  
371 1989 and 2000. *J Appl Microbiol.* 97(4):699-711.
- 372 16. Liu Q, Zhao H, Han L, Shu W, Wu Q, Ni Y. (2015) Frequency of biocide-resistant  
373 genes and susceptibility to chlorhexidine in high-level mupirocin-resistant, methicillin-  
374 resistant *Staphylococcus aureus* (MuH MRSA). *Diagn Microbiol Infect Dis.* 2015  
375 Aug;82(4):278-83.
- 376 17. Longtin J, Seah C, Siebert K. (2011) Distribution of antiseptic resistance genes *qacA*,  
377 *qacB*, and *smr* in methicillin resistant *Staphylococcus aureus* isolated in Toronto,  
378 Canada from 2005 to 2009. *Antimicrob Agents Chemother.* 55: 2999-3001.
- 379 18. McGann O, Kwak YI, Summers A. (2011) Detection of *qacA/B* in clinical isolates of  
380 methicillin resistant *Staphylococcus aureus* from a regional healthcare network in the  
381 eastern United States. *Infect Control Hosp Epidemiol.* 32:1116-9.
- 382 19. Oggioni MR, Furi L, Coelho JR, Maillard JY, Martínez JL. (2013) Recent advances in  
383 the potential interconnection between antimicrobial resistance to biocides and  
384 antibiotics. *Expert Rev Anti Infect Ther.* 11(4):363-6
- 385 20. Otter JA, Patel A, Cliff PR, Halligan EP, Tosas O, Edgeworth JD. (2013) Selection for  
386 *qacA* carriage in CC22, but not CC30, methicillin-resistant *Staphylococcus aureus*  
387 bloodstream infection isolates during a successful institutional infection control  
388 programme. *J Antimicrob Chemother.* 68(5):992-9.
- 389 21. Sedlock DM, Bailey DM. (1985) Microbicidal activity of octenidine hydrochloride, a  
390 new alkanediylbis [pyridine] germicidal agent. *Antimicrob Agents Chemother.*  
391 28(6):786-90.
- 392 22. Seemann T, Goncalves da Silva A, Bulach DM, Schultz MB, Kwong JC, Howden BP.  
393 (2011) Nullarbor. Available from <https://github.com/tseemann/nullarbor>

- 394 23. Spencer C, Orr D, Hallam S, Tillmanns E. (2013) Daily bathing with octenidine on an  
395 intensive care unit is associated with a lower carriage rate of methicillin-resistant  
396 *Staphylococcus aureus*. *J Hosp Infect.* 83(2):156-9.
- 397 24. Vali L, Davies SE, Lai LL, Dave J, Amyes SG. (2008) Frequency of biocide  
398 resistance genes, antibiotic resistance and the effect of chlorhexidine exposure on  
399 clinical methicillin-resistant *Staphylococcus aureus* isolates. *J Antimicrob Chemother.*  
400 61(3):524-32.
- 401 25. Wang J, Sheng WH. and Wang JL. (2008) Longitudinal analysis of chlorhexidine  
402 susceptibilities of nosocomial methicillin-resistant *Staphylococcus aureus* isolates at  
403 a teaching hospital in Taiwan. *J Antimicrob Chemother.* 62: pp.514-517.
- 404 26. Warren DK, Prager M, Munigala S, Wallace MA, Kennedy CR, Bommarito KM,  
405 Mazuski JE, Burnham CA. (2016) Prevalence of qacA/B Genes and Mupirocin  
406 Resistance Among Methicillin-Resistant *Staphylococcus aureus* (MRSA) Isolates in  
407 the Setting of Chlorhexidine Bathing Without Mupirocin. *Infect Control Hosp*  
408 *Epidemiol.* 37(5):590-7.
- 409 27. Wesgate R, Grasha P, Maillard JY. (2016) Use of a predictive protocol to measure  
410 the antimicrobial resistance risks associated with biocidal product usage. *Am J Infect*  
411 *Control.* 44(4):458-64.
- 412
- 413

414 **Table**

| Years                |               | <b>(1)</b> 1928-1953 | <b>(2)</b> 1954-2001 | <b>(3)</b> 2002-2012 | <b>(4)</b> 2013-2014 |
|----------------------|---------------|----------------------|----------------------|----------------------|----------------------|
| <b>Biocide Usage</b> | Chlorhexidine | None                 | Minimal              | Significant          | Significant          |
|                      | Octenidine    | None                 | None                 | None                 | Significant          |
| <b>Isolates</b>      | MSSA          | 15                   | 9                    | 1                    | 0                    |
|                      | MRSA          | 0                    | 54                   | 52                   | 26                   |

415 Table 1: Number of MRSA and MSSA isolates included in each period and corresponding  
416 biocide usage.

417



418 **Figures**

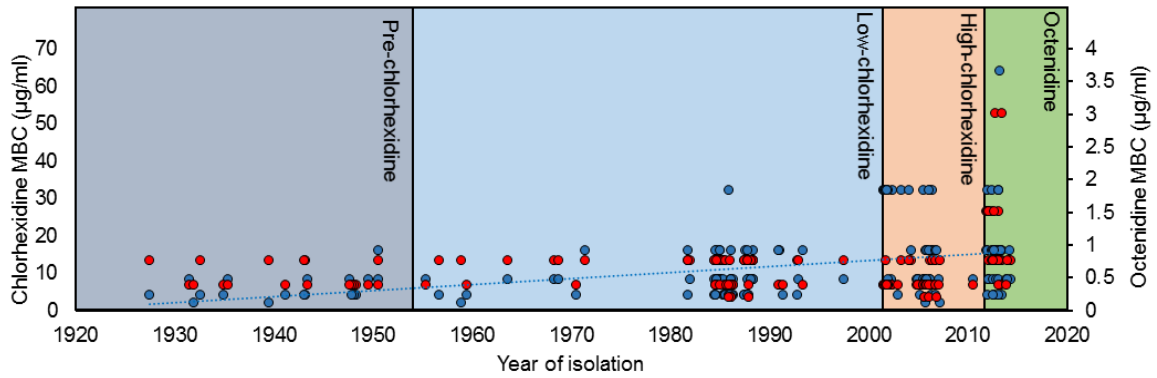

419

420 **Figure 1.** Timeline of mean MBC of chlorhexidine (blue circles) and octenidine (red circles)  
421 against isolates. The shaded boxes represent different periods of biocide usage. A trendline  
422 (blue, linear) is shown for chlorhexidine but not octenidine where isolates with decreased  
423 susceptibility only emerged in the final period.

424

425

426

427

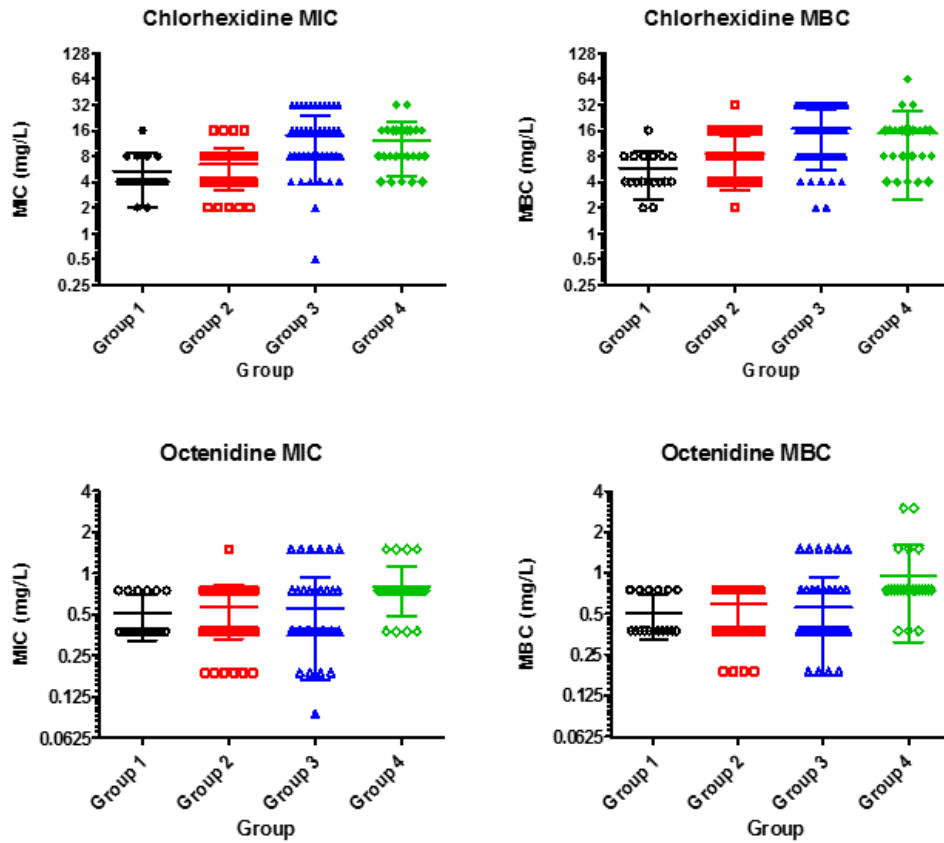

428

429

430 **Figure 2.** Mean MIC and MBC of *S. aureus* isolates to chlorhexidine and octenidine.

431

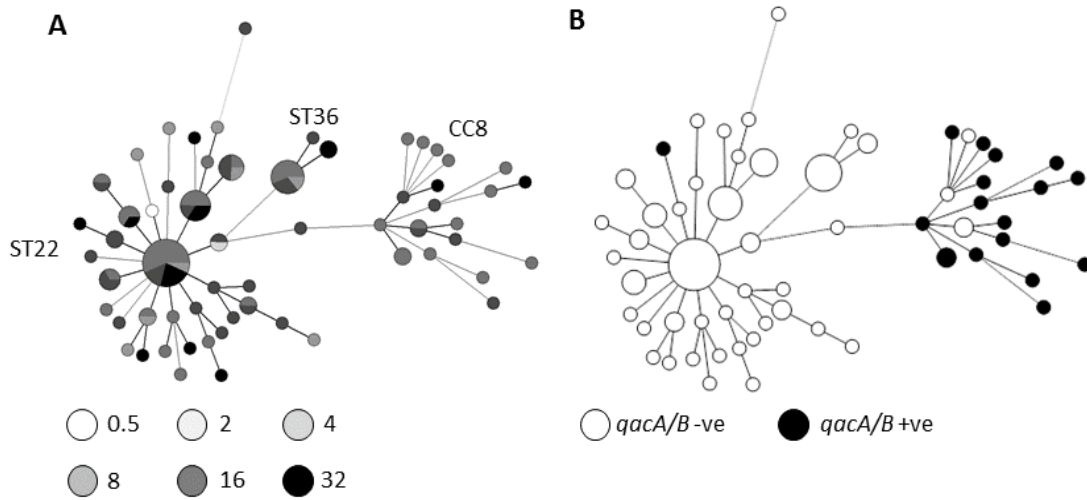

432

433 **Figure 3.** A minimum spanning tree of isolates based in VNTR profile. Sizes of circles  
434 reflect number of isolates Panel **A** shows isolates shaded by MIC of chlorhexidine (µg/ml) as  
435 per key below the tree. Panel **B** shows isolates found to carry *qacA/B* (black circles).

436

437

438

439

440

441

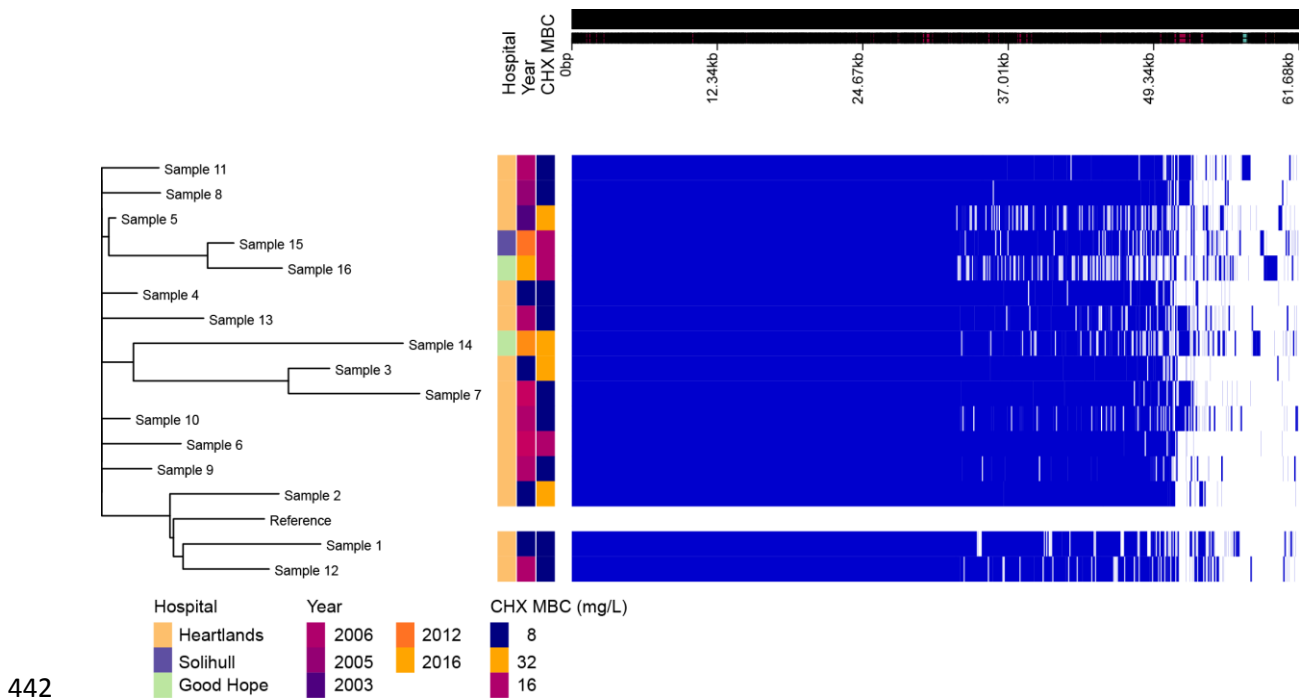

442

443 **Figure 4.** Visualisation of pan-genome analysis by ROARY of 16 isolates. Hospital and year  
444 of isolation are indicated as well as chlorhexidine MBC.

445
